# Supplementary figures and images for: Solid-state electrolytes from polysulfide integrated polyvinylpyrrolidone for quantum dot-sensitized solar cells
Source: Royal Society of Chemistry journal article supplement (doi:10.1039/c4ra10764k), 2014-11-06

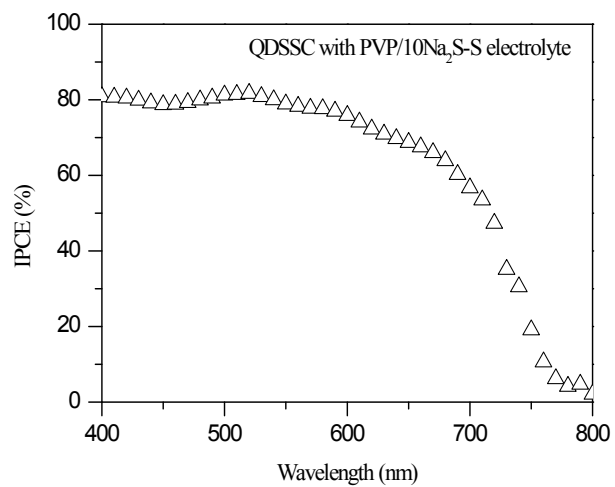

**Fig. S1** IPCE spectral action response of the QDSSC from PVP/10Na<sub>2</sub>S-S electrolyte.

Supplement: c4ra10764k1.pdf [file c4ra10764k1.pdf]
